# Supplementary material for: Room-temperature spin-valve devices based on Fe3GaTe2/MoS2/Fe3GaTe2 2D van der Waals heterojunctions
Source: Royal Society of Chemistry journal article supplement (doi:10.1039/d2nr06886a), 2023-01-01
Supplement: d2nr06886a1.pdf [file d2nr06886a1.pdf]

## Supporting Information

### **Room-Temperature Spin-Valve Effect in Fe<sub>3</sub>GaTe<sub>2</sub>/MoS<sub>2</sub>/Fe<sub>3</sub>GaTe<sub>2</sub> 2D van der Waals Heterojunction Devices**

*Wen Jin<sup>1,2</sup>, Gaojie Zhang<sup>1,2</sup>, Hao Wu<sup>1,2,3,4</sup>, Li Yang<sup>1,2</sup>, Wenfeng Zhang<sup>1,2,3</sup>, Haixin Chang<sup>1,2,3,4,\*</sup>*

<sup>1</sup>Center for Joining and Electronic Packaging, State Key Laboratory of Material Processing and Die & Mold Technology, School of Materials Science and Engineering, Huazhong University of Science and Technology, Wuhan 430074, China.

<sup>2</sup>Shenzhen R&D Center of Huazhong University of Science and Technology (HUST), Shenzhen 518000, China.

<sup>3</sup>Institute for Quantum Science and Engineering, Huazhong University of Science and Technology, Wuhan 430074, China.

<sup>4</sup>Wuhan National High Magnetic Field Center, Huazhong University of Science and Technology, Wuhan 430074, China.

\*Corresponding author. E-mail: [hxchang@hust.edu.cn](mailto:hxchang@hust.edu.cn)

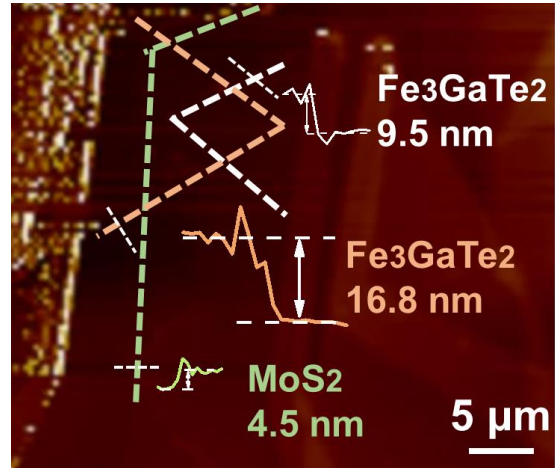

**Figure S1.** AFM topography with height profile of the Fe<sub>3</sub>GaTe<sub>2</sub>/MoS<sub>2</sub>/Fe<sub>3</sub>GaTe<sub>2</sub> heterojunction spin valve device. The regions marked by the white, green and orange line represent the top Fe<sub>3</sub>GaTe<sub>2</sub>, MoS<sub>2</sub>, and bottom Fe<sub>3</sub>GaTe<sub>2</sub> layer, respectively, indicating the thicknesses are 9.5 nm, 4.5 nm and 16.8 nm respectively.

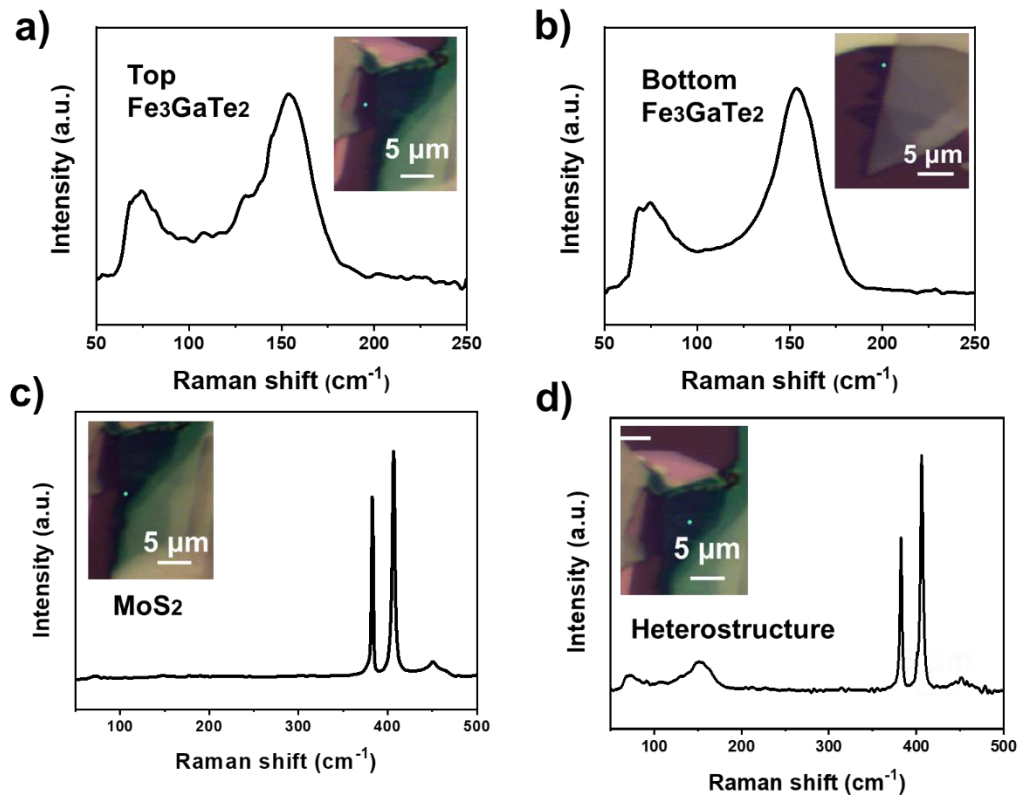

**Figure S2.** a) Raman spectra of the top Fe<sub>3</sub>GaTe<sub>2</sub> of the heterojunction. b) Raman spectra of the bottom Fe<sub>3</sub>GaTe<sub>2</sub> of the heterojunction. c) Raman spectra of the middle MoS<sub>2</sub> layer of the heterojunction. d) Raman spectra of the whole heterojunction.

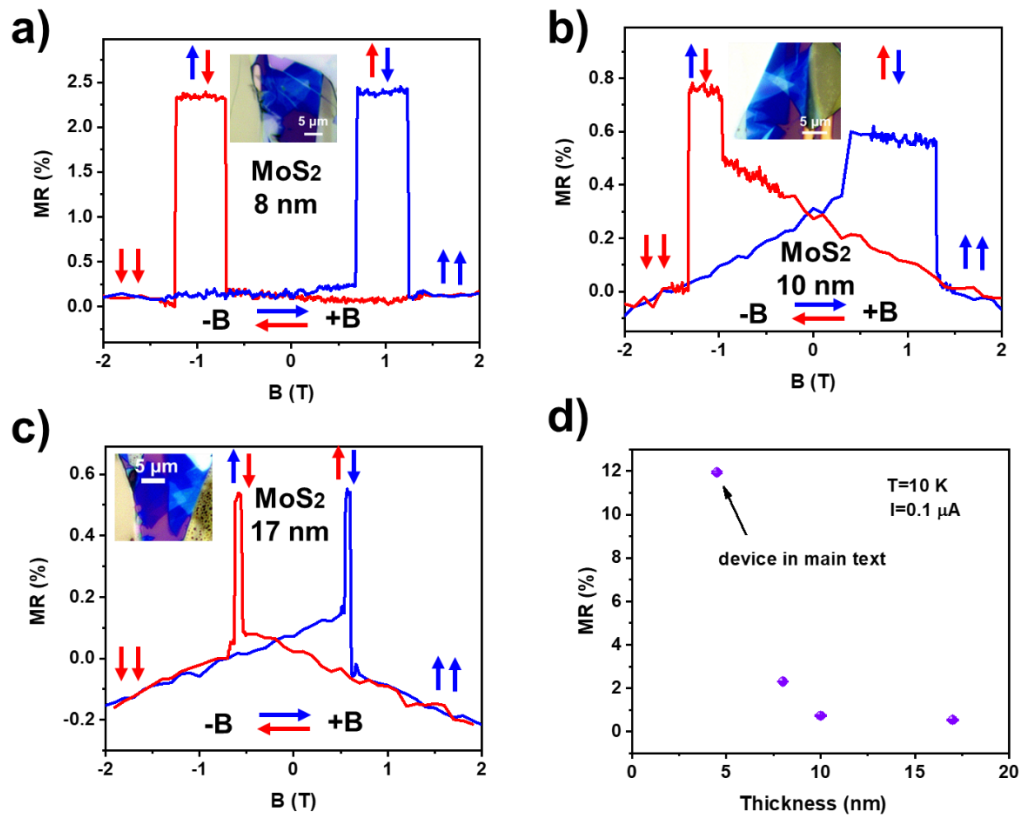

**Figure S3.** MR signals and optical images (inset) of  $\text{Fe}_3\text{GaTe}_2/\text{MoS}_2/\text{Fe}_3\text{GaTe}_2$  with different thicknesses of MoS<sub>2</sub> spacer layers, the thicknesses are 8 (a), 10 (b) and 17 nm, respectively. (d) The MR signal as a function of the MoS<sub>2</sub> thickness.
